# Supplementary material
Source: HighWire-hosted journal article supplement (https://www.jneurosci.org/content/37/36/8755)
Supplement: inline-supplementary-material-3 [file inline-supplementary-material-3.docx]

| Hemi | ROI | Sensory bias | Angle of mean vector (°) | | Length of mean vector (*z* units) | |
| --- | --- | --- | --- | --- | --- | --- |
|  |  |  | Mean | SD | Mean | SD |
| LH | sPCS | visual | 7.7 | 60.0 | 2.05 | 1.01 |
| tgPCS | auditory | -32.3 | 14.9 | 1.68 | 0.79 |
| iPCS | visual | 17.5 | 10.6 | 2.38 | 0.57 |
| cIFS | auditory | -44.9 | 14.7 | 1.60 | 0.56 |
| pVis | visual | 52.7 | 20.5 | 0.85 | 0.26 |
| pAud | auditory | -56.0 | 17.0 | 0.83 | 0.24 |
| AIC | MD | -6.1 | 7.7 | 2.17 | 0.47 |
| dACC | MD | -2.5 | 7.5 | 2.61 | 0.68 |
| RH | sPCS | visual | 21.0 | 23.2 | 2.31 | 0.88 |
| tgPCS | auditory | -36.2 | 39.6 | 1.41 | 0.57 |
| iPCS | visual | 13.8 | 11.7 | 2.49 | 0.52 |
| cIFS | auditory | -36.1 | 18.7 | 1.39 | 0.43 |
| pVis | visual | 62.9 | 33.2 | 0.64 | 0.19 |
| pAud | auditory | -58.1 | 20.0 | 0.71 | 0.19 |
| AIC | MD | -3.0 | 12.5 | 2.22 | 0.40 |
| dACC | MD | 2.4 | 10.5 | 2.26 | 0.45 |

Extended Data Table 6-1. Angle and length of mean vectors for each ROI shown in Figure 6 of the main text. Angles are reported as θ - 45° such that 0 corresponds to the y=x multiple-demand line, positive numbers approach the visual axis (45°); i.e., counter-clockwise from that line) and negative numbers approach the auditory axis (-45°).
